# Supplementary material for: Identification of complexes of Nd(iii) with dithiophosphinic acids verifying the difference in complexation between Ln(iii) and An(iii)
Source: Royal Society of Chemistry journal article supplement (doi:10.1039/d2dt00625a), 2022-01-01
Supplement: d2dt00625a1.pdf [file d2dt00625a1.pdf]

## Electronic Supplementary Information (ESI)

# Identification of Complexes of Nd(III) with Dithiophosphinic Acids Verifying Difference in Complexation between Ln(III) and An(III)

Qiling Guo,<sup>a</sup> Tuo Fang,<sup>a</sup> Qian Liu,<sup>a</sup> Liyang Zhu,<sup>a</sup>

Suliang Yang<sup>\*a</sup> and Guoxin Tian<sup>\*a, b</sup>

<sup>a</sup>. Department of Radiochemistry, China Institute of Atomic Energy, Beijing 102413, China.

<sup>b</sup>. Institute of Nuclear and New Energy Technology, Tsinghua University, Beijing 100084, China.

## Detailed Experimental Information

### Chemicals and Reagents

Cyanex 301 which contains about 70% Bis(2,4,4-trimethylpentyl) dithiophosphinic acid (denoted as HA), provided by the Institute of Nuclear and New Energy Technology of Tsinghua University, was purified by the reported procedure<sup>1</sup> and stored as the form of ammonium salt. The purity of the purified product was examined by <sup>31</sup>P-NMR. The content of HA was determined to be higher than 99% (w/w) by acid-base titration. The 50% aqueous solution of (iso-C<sub>4</sub>H<sub>9</sub>)<sub>2</sub>PS<sub>2</sub>Na was purchased from Gelest Inc. (America). All other reagents are of analytical grade, purchased from the China National Pharmaceutical Group Corporation. The HA-toluene solution was prepared by the extraction of HA to the diluent after acidification with 3.0 M HCl. Milli-Q water was used in preparing all aqueous solutions. No attempts were made to control the ionic strength in the experiments.

### Extraction

Add 2 mL HA-toluene solution and 1 mL Nd(NO<sub>3</sub>)<sub>3</sub> stock solutions into one flat-bottom vial, then add certain amounts of NaOH solution according to the desired percentage of neutralization (5%, 10%, 20%, 40%, 60%, 80%, 90%, 95%), and finally add Milli-Q water to make sure the phase volume ratio,  $V_o/V_a$ , as 1.

Stir vigorously using magnetic stirrer under 10, 25 or 45°C water bath for 2 hours to ensure the complete extraction. After the extraction, leave the bottle still for 1 hour under water bath to allow the separation of the two phases. Transfer 1.0 mL of the organic phase into a 10×4 mm quartz cuvette for absorption spectra measurement.

The Nd(III)-loaded organic phase was stripped ( $V_o/V_a = 1$ ) by 1.0 M HNO<sub>3</sub> solution for 30 minutes under magnetic stirring. After separation, transfer 1.0 mL of the aqueous phase into a 10×4 mm quartz cuvette for absorption spectra measurement. The concentration of Nd(III) in the initial Nd(III)-loaded organic phases can be calculated by the absorption spectra of the aqueous phase of stripping.

### Spectrophotometry

The absorption spectra of the organic phases were collected on an Agilent Cary 7000 UV-Vis-NIR Spectrophotometer, in the range of 490-630 nm, with an interval of 0.1 nm and a bandwidth of 0.5 nm. A semiconductor temperature control accessories was used to control the temperature of the samples.

The molar absorption spectra were obtained by normalizing the absorption spectra with the concentration of Nd(III) in organic phases.

The deconvoluted absorption spectra of species I, II and III were calculated by Multivariate Curve Resolution-Alternating Least Squares(MCR-ALS) method<sup>2</sup>. The distribution of the three species under different conditions can be calculated by absorption spectrophotometry, based on the deconvoluted absorption spectra of species I, II and III.

### Water Content

The water contents of the organic phases were determined by Karl Fischer coulometry on a Metrohm 852 water analyzer.

The water content of the extracted complex( $W_e$ ) was calculated as following equation:

$$W_e = W_o - W_b \quad (1)$$

$W_o$  is the water content of the samples after extraction, and  $W_b$  is the blank water content of the organic sample when the percent neutralization( $\alpha$ ) is 0.

The accuracy of this method to determine the water content in this system has been examined by the standard addition experiments: (1) Mix the HA-toluene solutions or organic phases at different Nd(III) loadings with certain amount of methanol containing water at different volume ratios (3:1, 2:1, 1:1, 1:2, 1:3); (2) Determine the water content of each sample (organic phase before mixing, mixed samples, methanol) by Karl Fischer coulometry analysis method.

The results showed a good linear relationship of the water concentration to the response signal, which indicated that the presence of HA did not affect the measurement of water content by Karl Fischer coulometry analysis method.

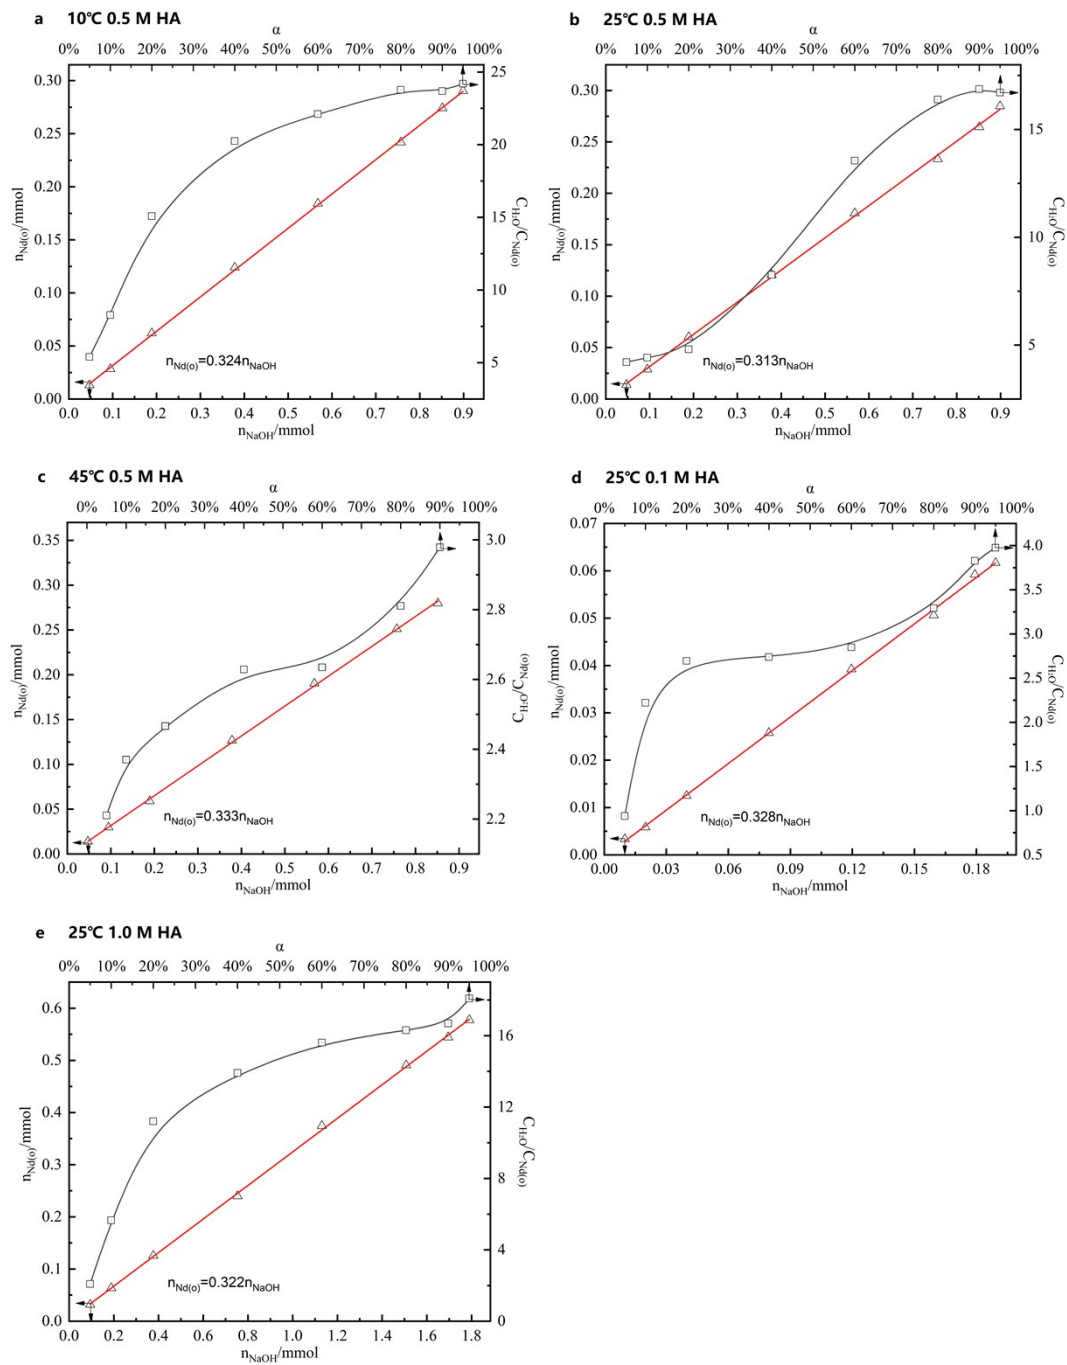

**Fig. S1** The relationships between loaded Nd(III) to NaOH added for neutralization (red line, lower x-axis and left y-axis) and to the water content of the extracted complex (black curve, upper x-axis and right y-axis) prepared under different conditions.  $\alpha$  refers to the percent neutralization.

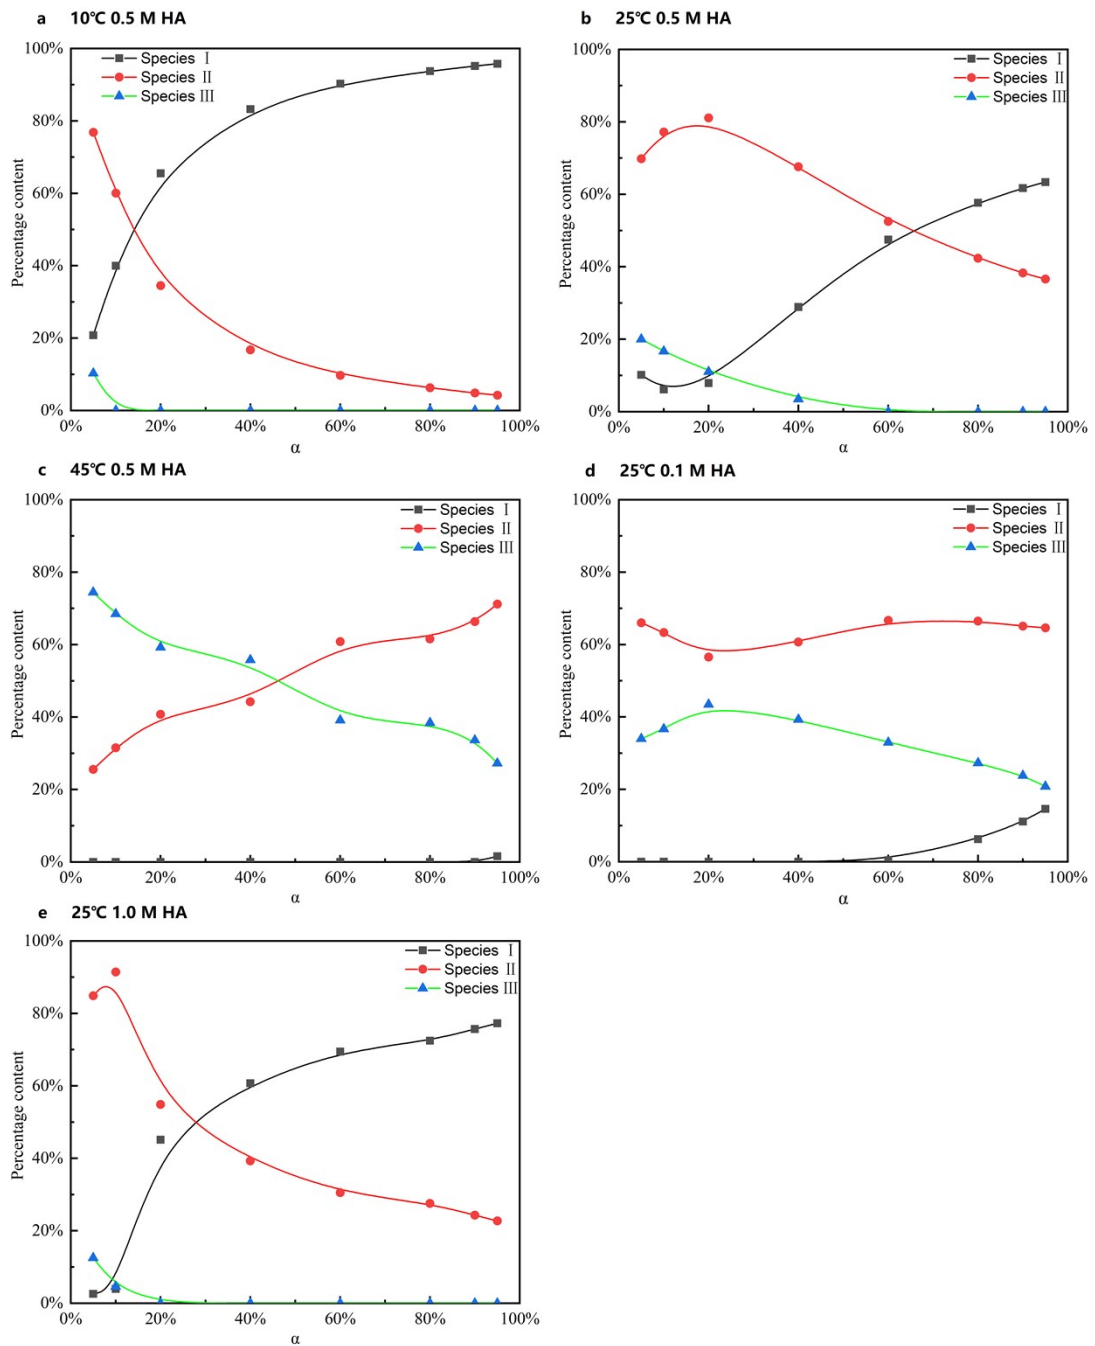

**Fig. S2** The distribution of the three species under different conditions.  $\alpha$  refers to the percent neutralization.

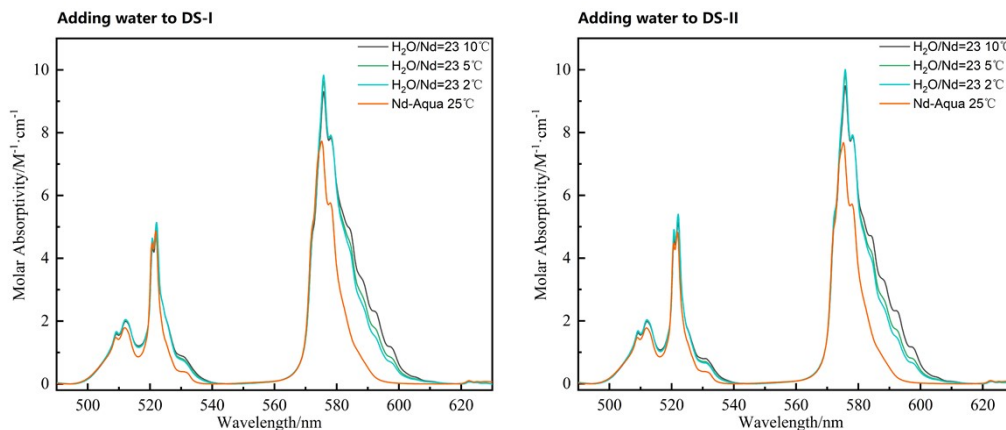

**Fig. S3** Spectra of DS-I and DS-II samples with water added at low temperature.

**Table S1.** Crystal Data and Structure Refinement for  $\text{Nd}(\text{H}_2\text{O})_9 \cdot \text{H}_2\text{O} \cdot 3\text{B}$  (HB = bis(iso-butyl)dithiophosphinic acid)

| Complex                                 | $\text{Nd}(\text{H}_2\text{O})_9 \cdot \text{H}_2\text{O} \cdot 3\text{B}$                                                                                           |
|-----------------------------------------|----------------------------------------------------------------------------------------------------------------------------------------------------------------------|
| Empirical formula                       | $\text{C}_{24}\text{H}_{74}\text{NdO}_{10}\text{P}_3\text{S}_6$                                                                                                      |
| Formula weight                          | 952.34                                                                                                                                                               |
| Temperature                             | 100.02(10) K                                                                                                                                                         |
| Radiation                               | MoK $\alpha$ ( $\lambda = 0.71073$ )                                                                                                                                 |
| Crystal system, space group             | Monoclinic, $P2_1/c$                                                                                                                                                 |
| Unit cell parameters                    | $a = 16.9097(4) \text{ \AA}$ , $\alpha = 90^\circ$<br>$b = 25.6255(5) \text{ \AA}$ , $\beta = 98.040(2)^\circ$<br>$c = 10.9443(3) \text{ \AA}$ , $\gamma = 90^\circ$ |
| Cell volume                             | $4695.76(19) \text{ \AA}^3$                                                                                                                                          |
| Z                                       | 4                                                                                                                                                                    |
| Calculated density                      | $1.347 \text{ g/cm}^3$                                                                                                                                               |
| Absorption coefficient                  | $1.514 \text{ mm}^{-1}$                                                                                                                                              |
| F(000)                                  | 1996.0                                                                                                                                                               |
| Crystal size                            | $0.2 \times 0.2 \times 0.15 \text{ mm}^3$                                                                                                                            |
| Range for data collection               | $6.544$ to $62.358^\circ$                                                                                                                                            |
| Index ranges                            | $-21 \leq h \leq 21$ , $-32 \leq k \leq 36$ , $-14 \leq l \leq 15$                                                                                                   |
| Reflections collected                   | 44211                                                                                                                                                                |
| Independent reflections                 | 11970 [ $R_{\text{int}} = 0.0589$ , $R_{\text{sigma}} = 0.0519$ ]                                                                                                    |
| Data/restraints/parameters              | 11970/24/420                                                                                                                                                         |
| Goodness-of-fit on $F^2$                | 1.041                                                                                                                                                                |
| Final R indexes [ $I \geq 2\sigma(I)$ ] | $R_1 = 0.0578$ , $wR_2 = 0.1495$                                                                                                                                     |
| Final R indexes [all data]              | $R_1 = 0.0694$ , $wR_2 = 0.1587$                                                                                                                                     |
| Largest diff. peak and hole             | 6.65 and $-1.51 \text{ e/\AA}^{-3}$                                                                                                                                  |

## References

1. Y. Zhu, J. Chen and R. Jiao, *Solvent Extraction and Ion Exchange*, 1996, **14**, 61-68.
2. J. Jaumot, A. D. Juan and R. Tauler, *Chemometrics & Intelligent Laboratory Systems*, 2015, **140**, 1-12.
